# Supplementary material
Source: publisher site journal article supplement (https://www.dovepress.com/article/280314)
Supplement: Supplementary file 1 [file get_supplementary_file.php]

**SUPPLEMENTARY DATA**

a.

b.

c.

**Supplementary figure 1. Detection of PRpSer400, PKCα and their colocalization in astrocytomas between sexes.** % of positive cells for PR (a) for PKCα (b) and their colocalization PR/PKCα (c). For each sample, 25 fields were taken. Results are expressed as the mean ± SD. Dunnet post-test determined the statistical difference (* p ≤ 0.05 vs NT and & p ≤ 0.05 vs all groups). F: Female, M: male, NT: Non-Tumor, G: astrocytoma grade.

a.

b.

c.

**Supplementary figure 2. Spearman correlation between astrocytomas grades and the age of patients according to detection of PR, PKCα and PR/PKCα colocalization.** % of positive cells for PR (a), for PKC α (b) and their colocalization (c). Black circles: GI and GII; blue triangles: GIII; red squares: GIV.

**
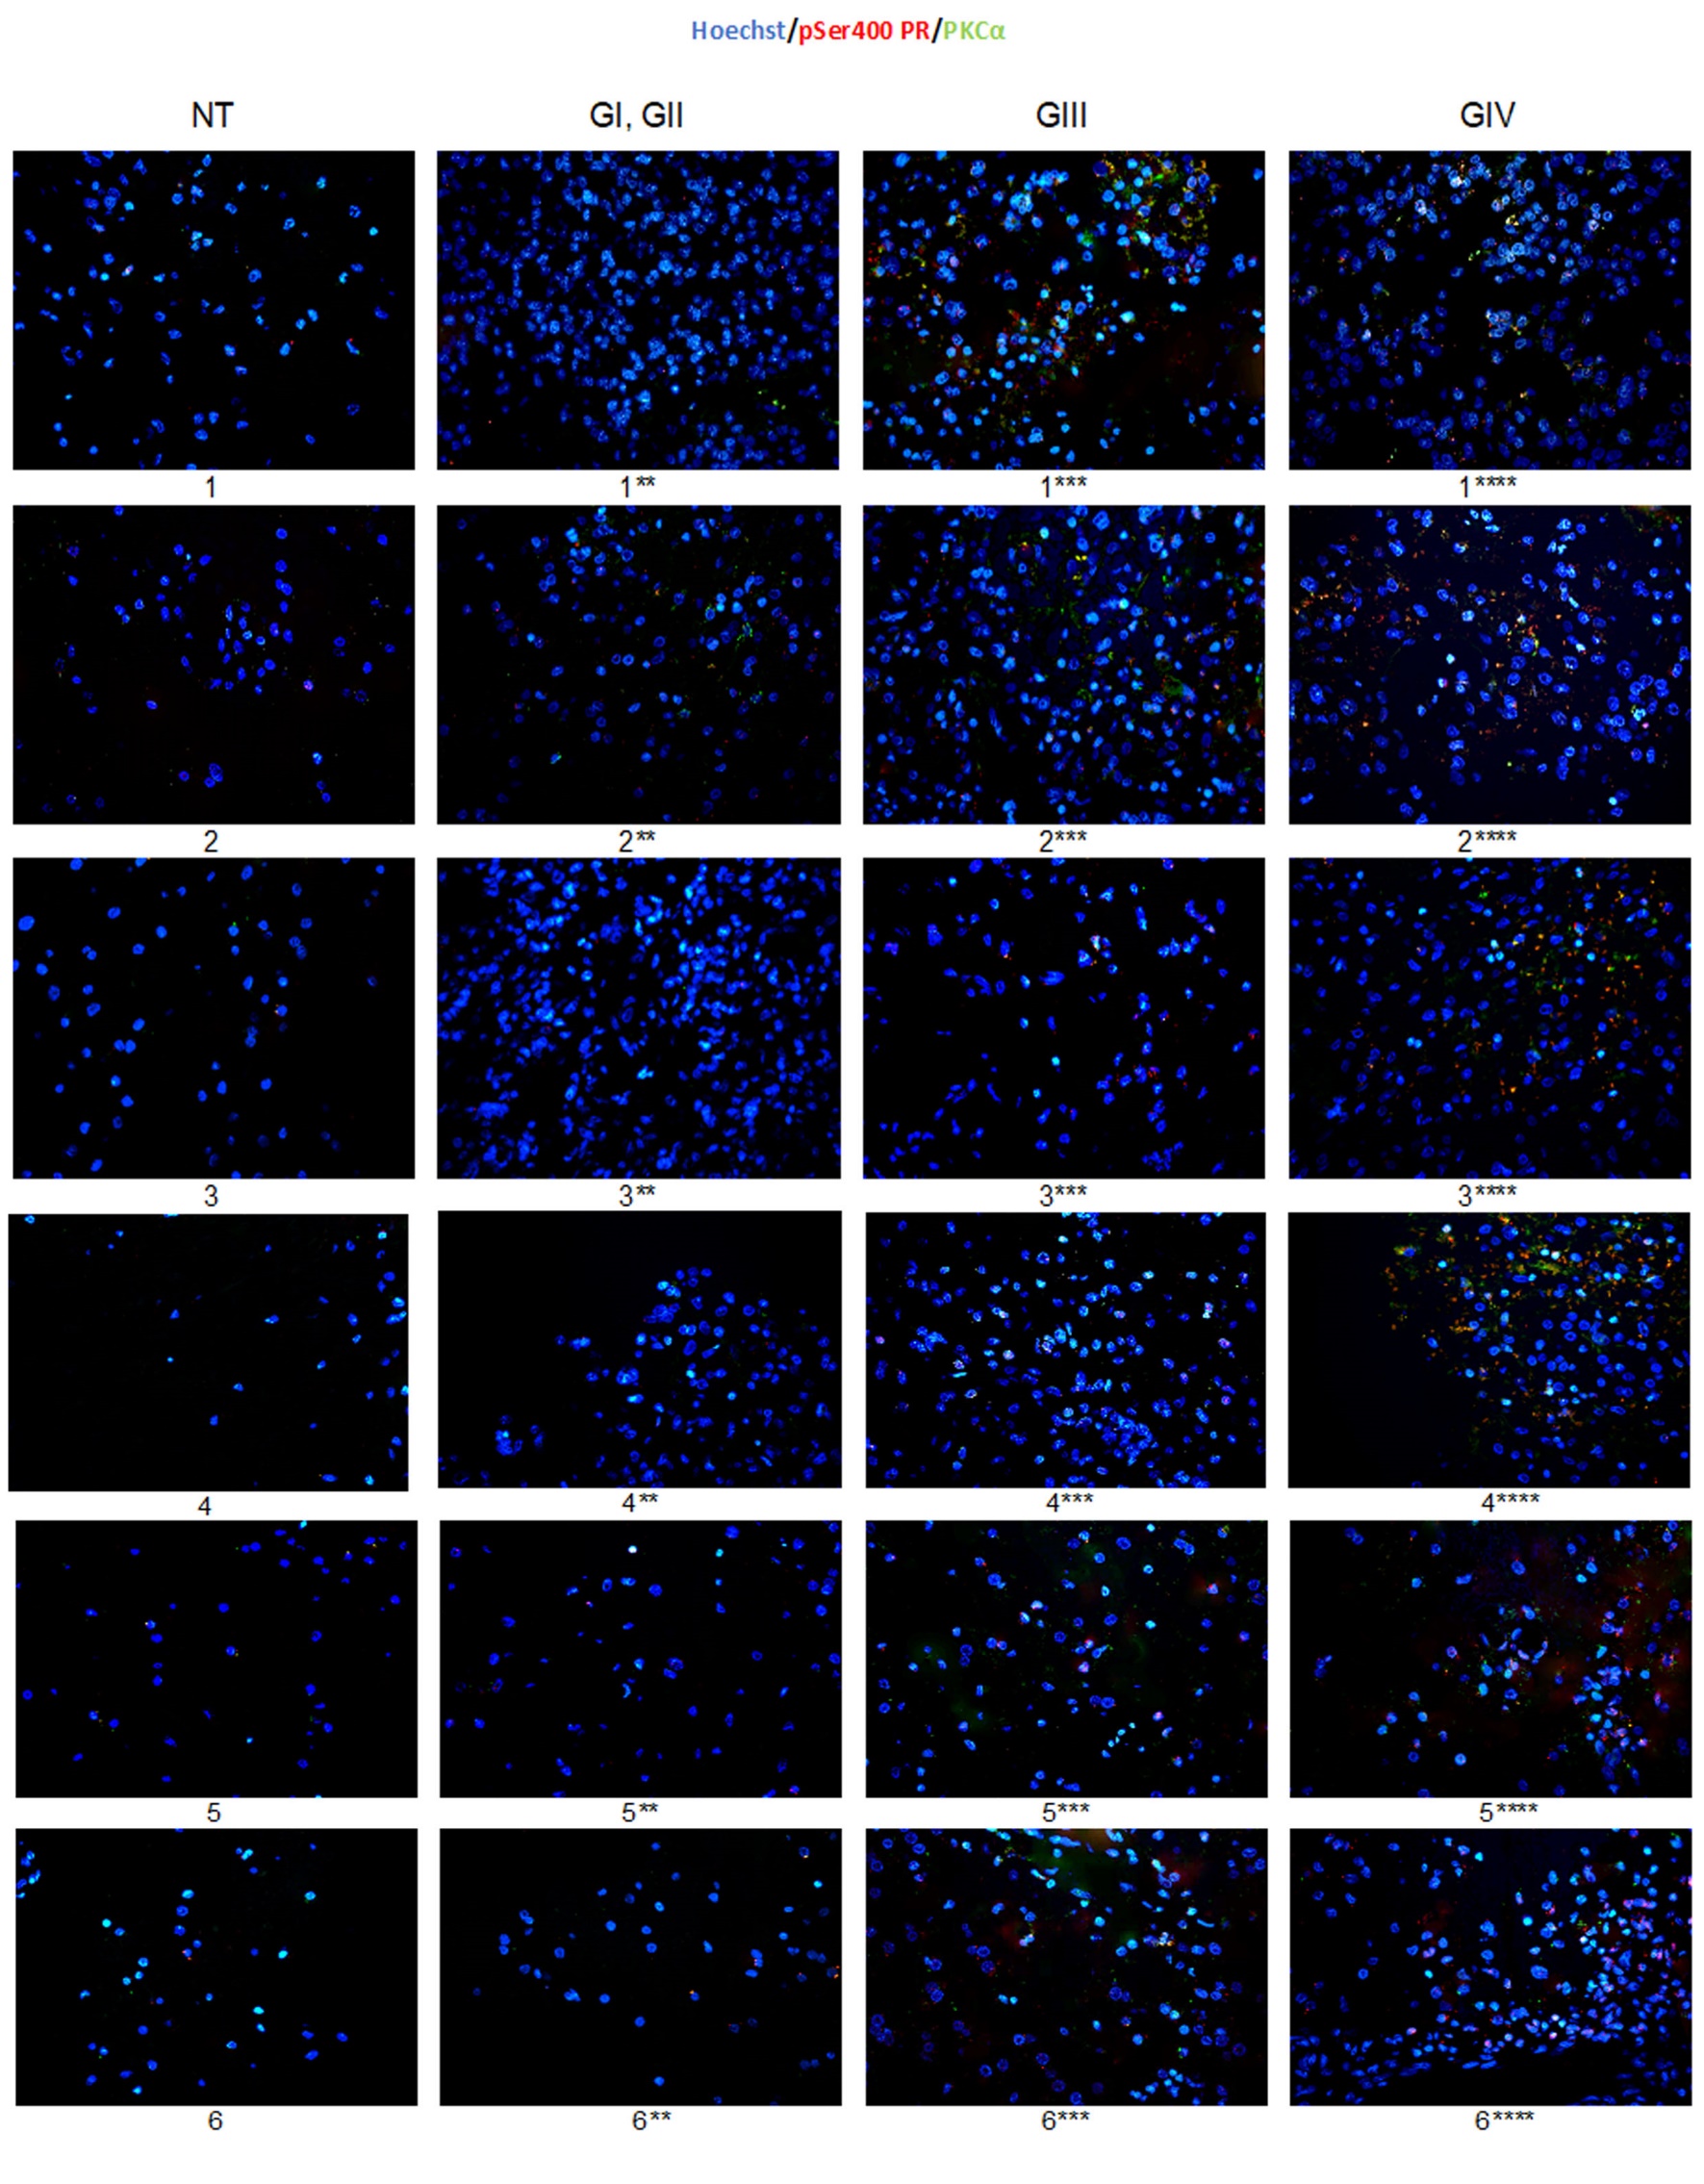
**

**Supplementary Figure 3. Representative images of PR pSer400 and PKCα colocalization in each patient with different grades of astrocytoma.** Representative sections of astrocytic tumors from each patient are shown (6 patients for each astrocytoma grade including non-tumor) NT: Non-tumor tissue, G: astrocytomas grade. Samples were immunostained for PR pSer400 and PKCα. Blue: nucleus, green: PKCα, red: PR pSer400 and orange: merge between three channels (original magnification, 600X). Asteriscs represent patients with different astrocytoma grade; numbers without asterisk represent subjects with no tumor.


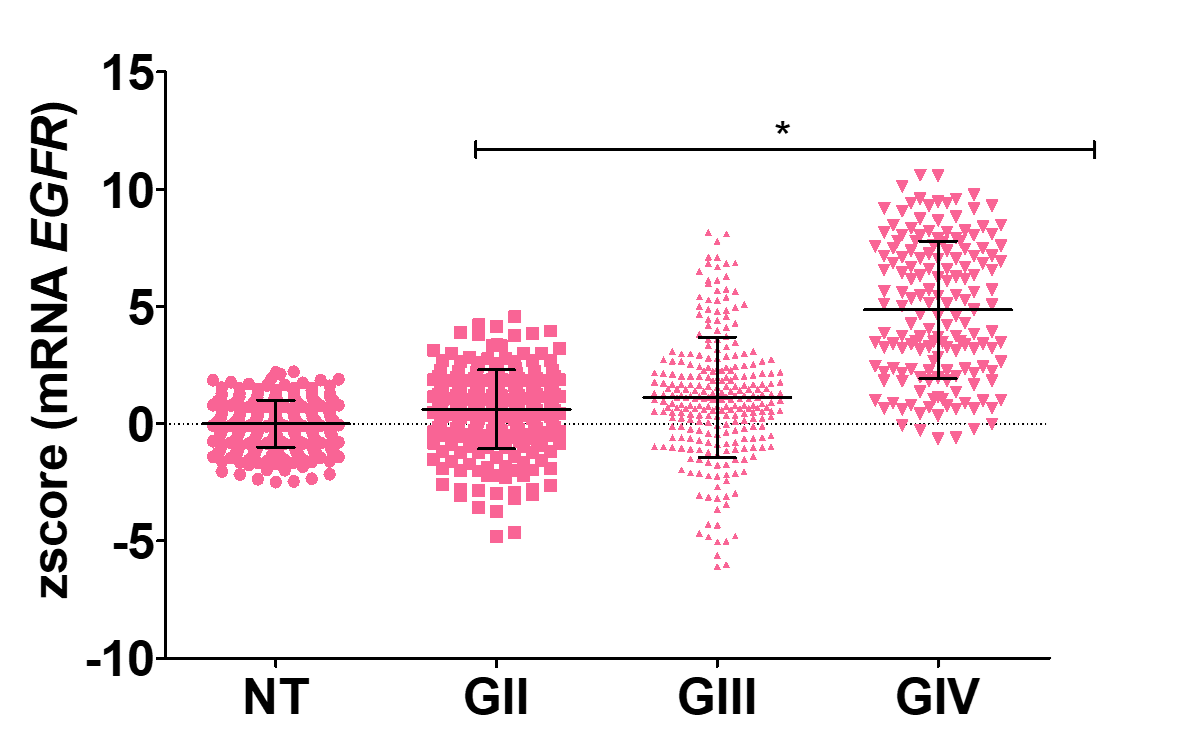


**Supplementary Figure 4. Expression of mRNA for *EGFR*.** Results are expressed as the mean ± SD. Dunnet post-test determined the statistical difference (* p ≤ 0.005 vs NT). NT: Non-Tumor, G: astrocytomas grade.

b.

a.

**Supplementary figure 5. mRNA for *PGR* and *PRKCA* levels of astrocytomas grades between sexes.** mRNA levels for*PGR* (a) and *PRKCA* (b) between sexes*.* Results are expressed as the mean ± SD. Dunnet post-test determined the statistical difference. F: female, M: male, NT: Non-Tumor, G: astrocytoma grade.


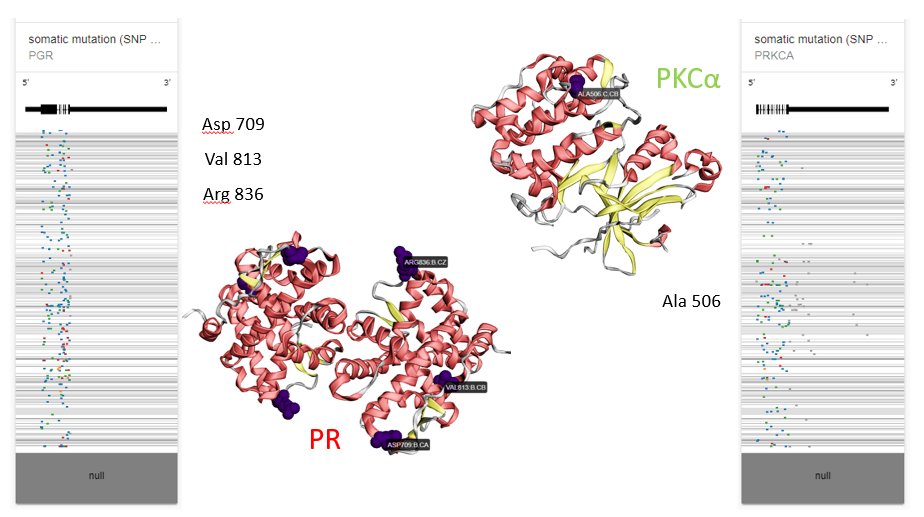


**Supplementary figure 6. Mutations at protein level.** *In silico* analysis using TCGA data for GBM mutations, PR (left) and PKCα (right). <https://xenabrowser.net/heatmap/> MuPTI (hg19 coding)
